# Supplementary material for: Melting and defect transitions in FeO up to pressures of Earth’s core-mantle boundary
Source: Springer Nature journal article supplement (doi:10.1038/s41467-023-43154-w), 2023-11-13
Supplement: MOESM1 [file 41467_2023_43154_MOESM1_ESM.pdf › 41467_2023_43154_MOESM1_ESM.pdf]

## **Supplementary Material for Melting and defect transitions in FeO up to pressures of Earth's core-mantle boundary**

Vasilije V. Dobrosavljevic<sup>1,5\*</sup>, Dongzhou Zhang<sup>2</sup>, Wolfgang Sturhahn<sup>1</sup>, Stella Chariton<sup>3</sup>, Vitali B. Prakapenka<sup>3</sup>, Jiyong Zhao<sup>4</sup>, Thomas S. Toellner<sup>4</sup>, Olivia S. Pardo<sup>1,6</sup>, Jennifer M. Jackson<sup>1</sup>

<sup>1</sup>Seismological Laboratory, Division of Geological and Planetary Sciences, California Institute of Technology; Pasadena, CA, USA.

<sup>2</sup>Hawai'i Institute of Geophysics and Planetology, University of Hawai'i at Mānoa; Honolulu, HI, USA.

<sup>3</sup>Center for Advanced Radiation Sources, The University of Chicago; Chicago, IL, USA.

<sup>4</sup>Advanced Photon Source, Argonne National Laboratory; Chicago, IL, USA.

<sup>5</sup>Now at Earth and Planets Laboratory, Carnegie Institution for Science, Washington D.C., USA.

<sup>6</sup>Now at Physics Division, Physical & Life Sciences Directorate, Livermore, CA, USA.

\*Corresponding author. Email: vasilije@carnegiescience.edu

### **Contents:**

#### Figures

S1 – Additional XRD patterns  
S2-6 – All XRD heating runs  
S7-9 – All SMS heating runs  
S10-13 – All SMS time spectra  
S14 – Thermal pressure

#### Tables

S1-3 – Transition  $P$ - $T$  conditions  
S4-14 – Fitting results for all SMS time spectra

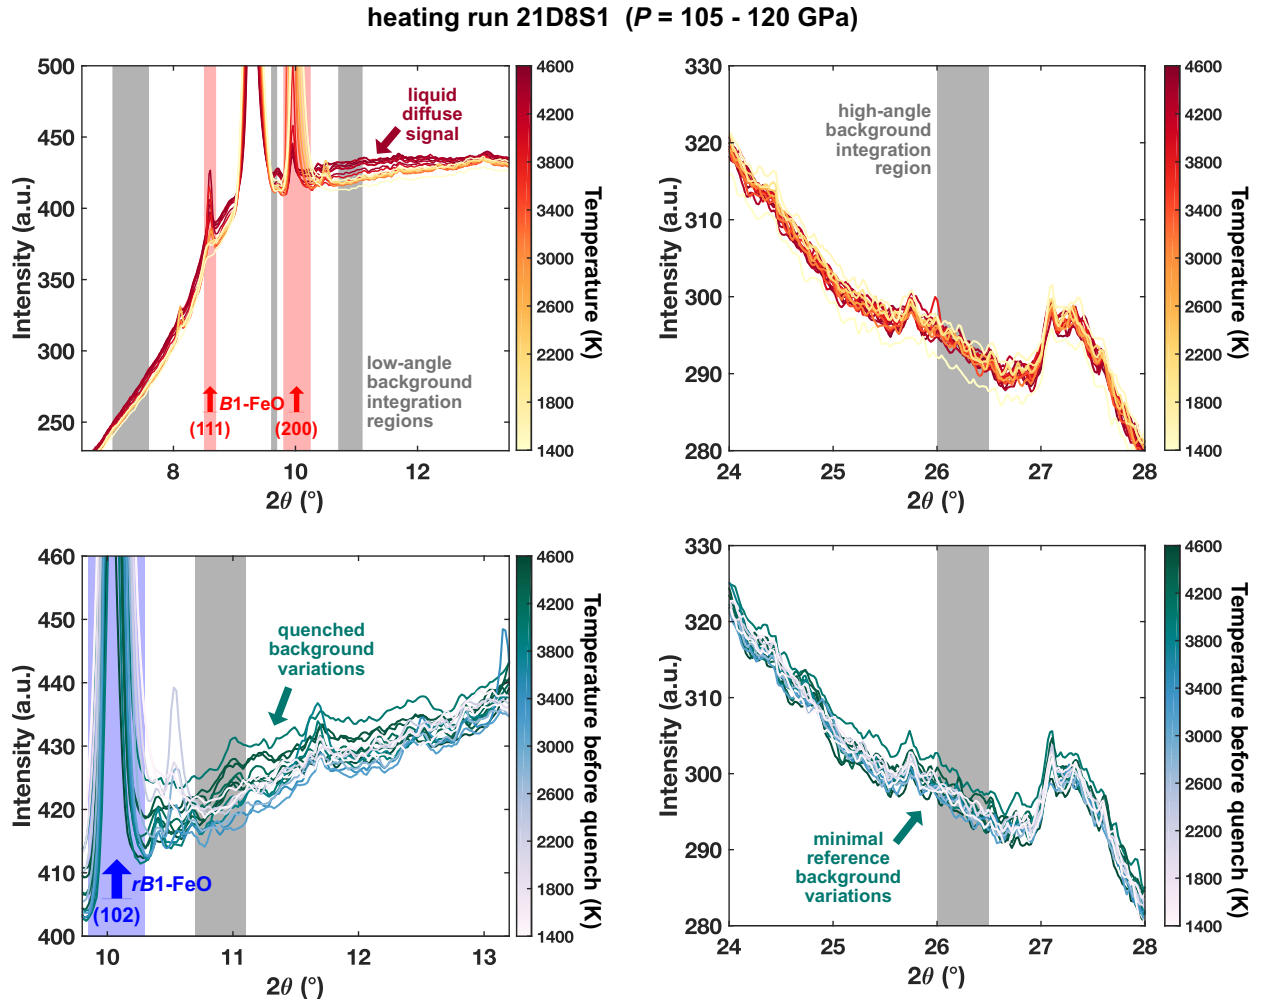

**Fig. S1.**

XRD heating run 21D8S1. Top panels show high-temperature integrated patterns. Shaded bars indicate FeO reflections (red) and background integration regions (gray). Bottom panels show quenched integrated patterns. Background intensities at low angles relative to high angles vary during the heating run (Fig. 3).

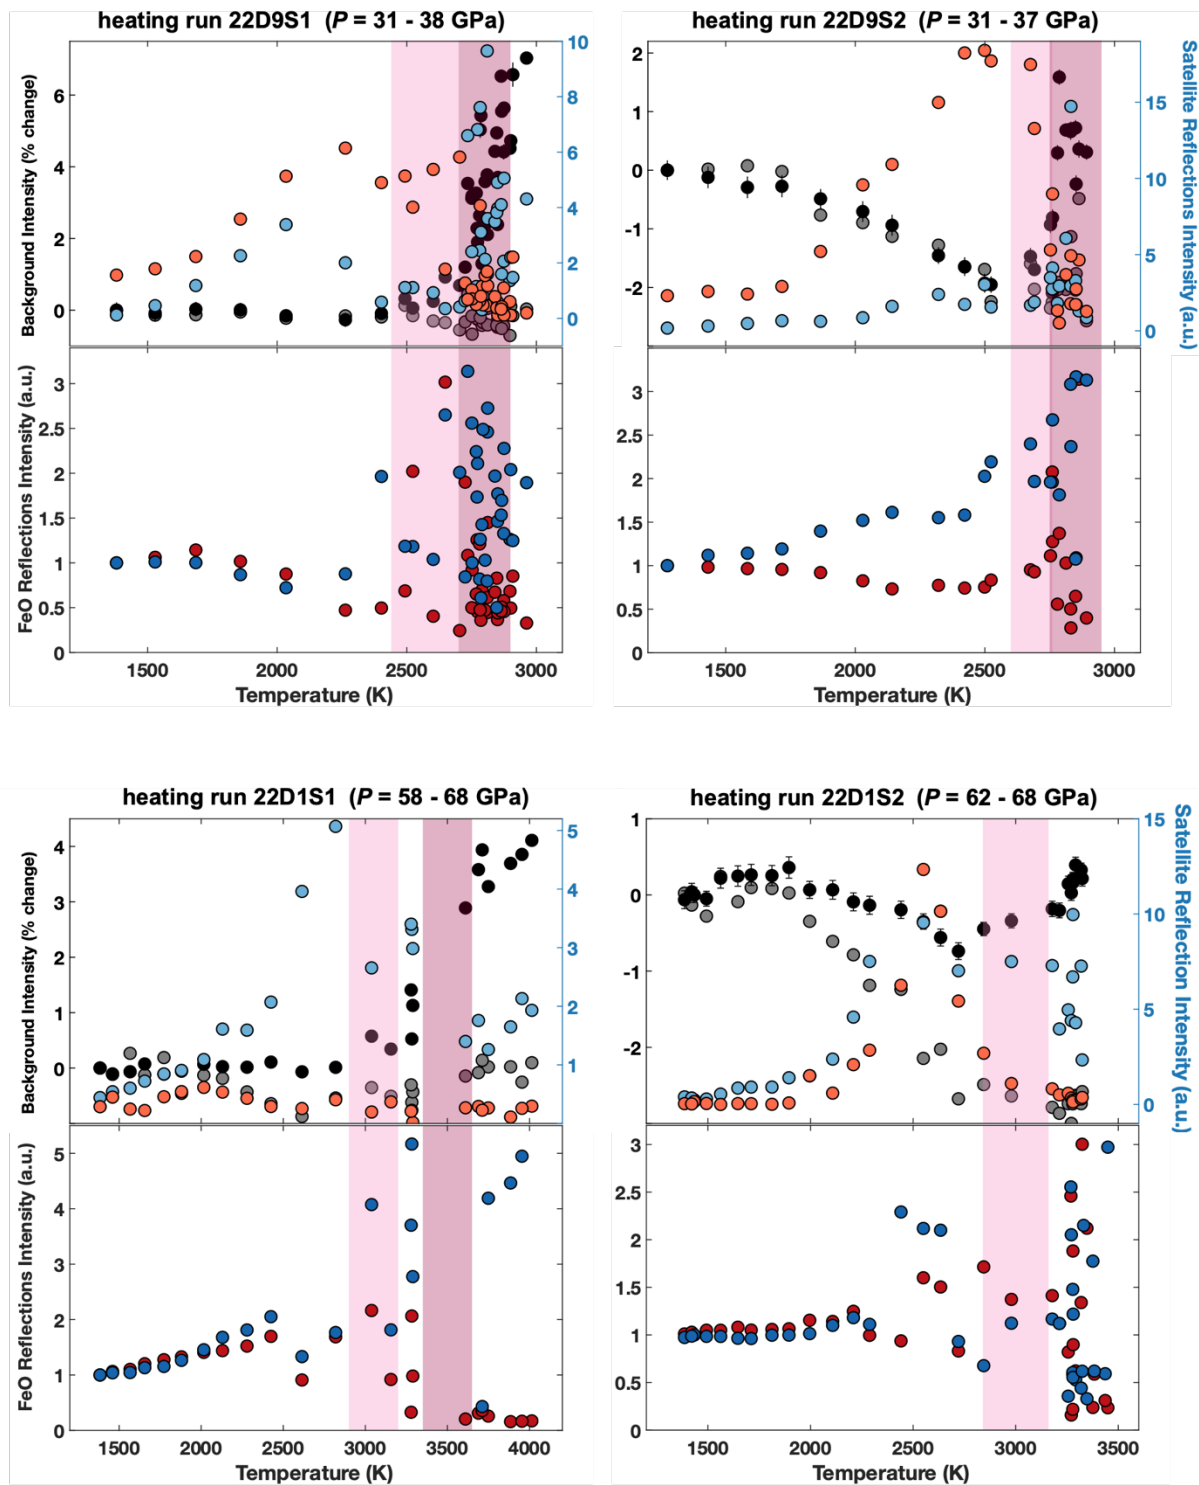

**Fig. S2.**

XRD heating runs 22D9S1, 22D9S2, 22D1S1, and 22D1S2. Format of panels and meaning of colors for data and shaded boxes are identical to Fig. 2.

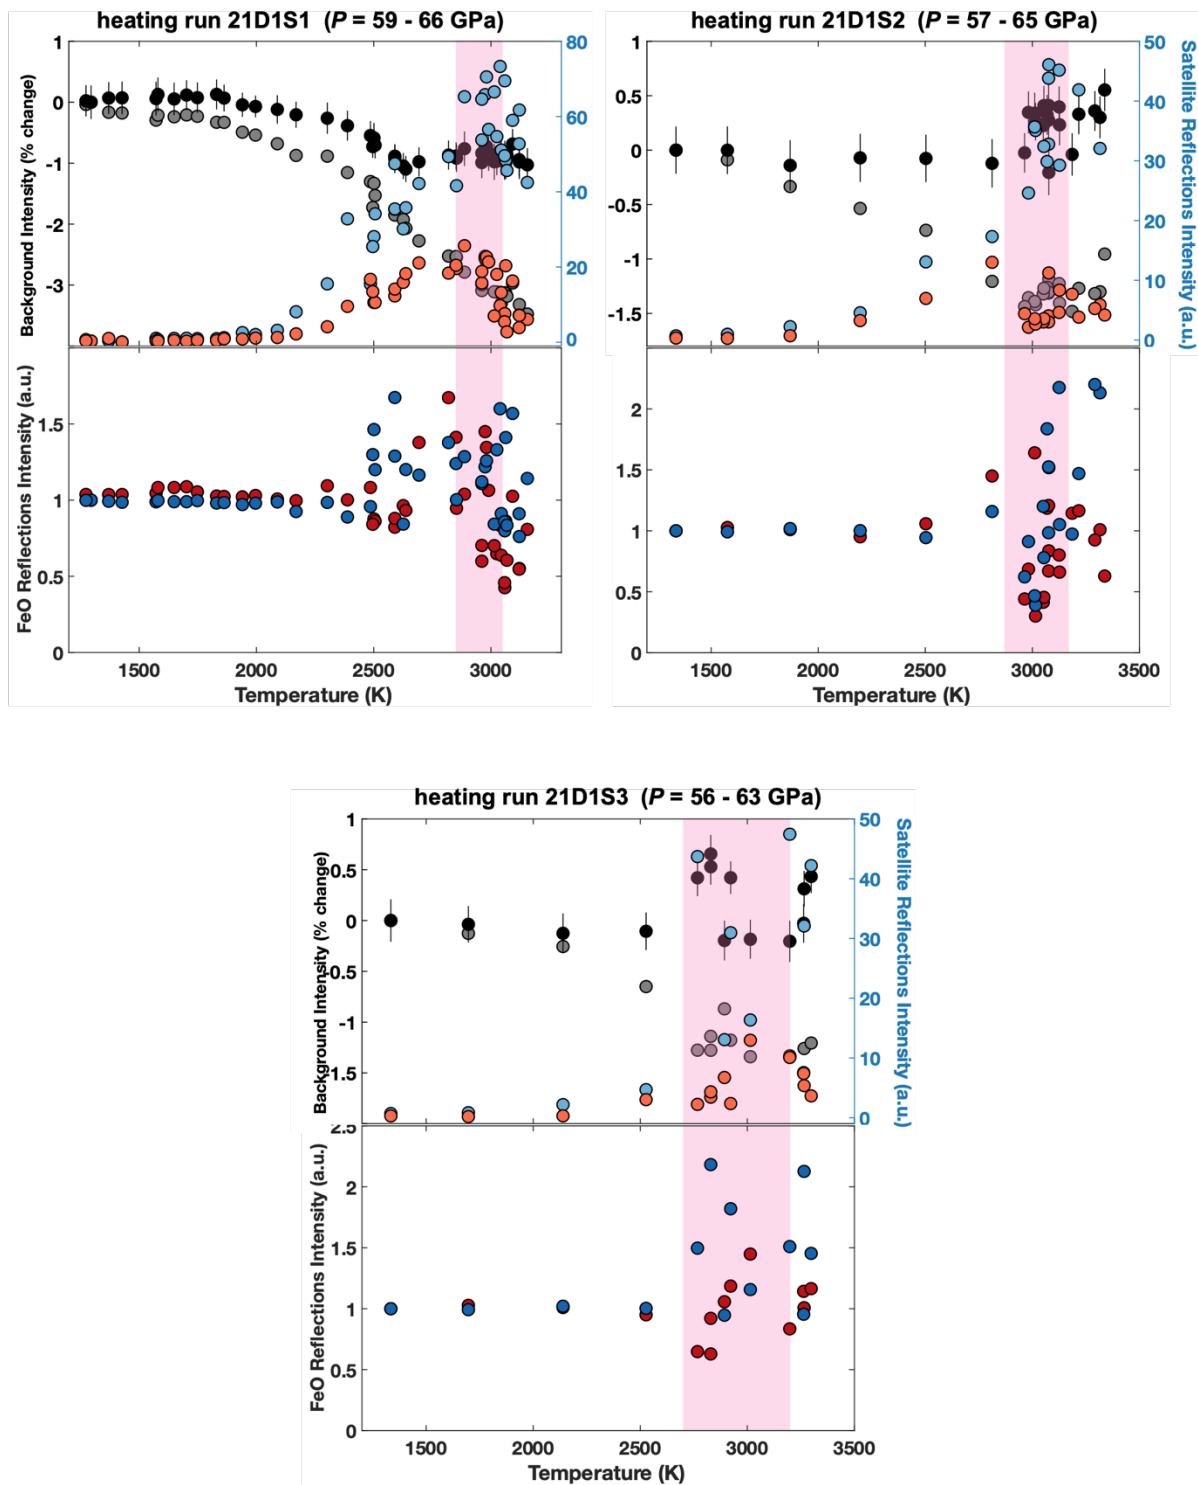

**Fig. S3.**

XRD heating runs 21D1S1, 21D1S2, and 21D1S3. Format of panels and meaning of colors for data and shaded boxes are identical to Fig. 2.

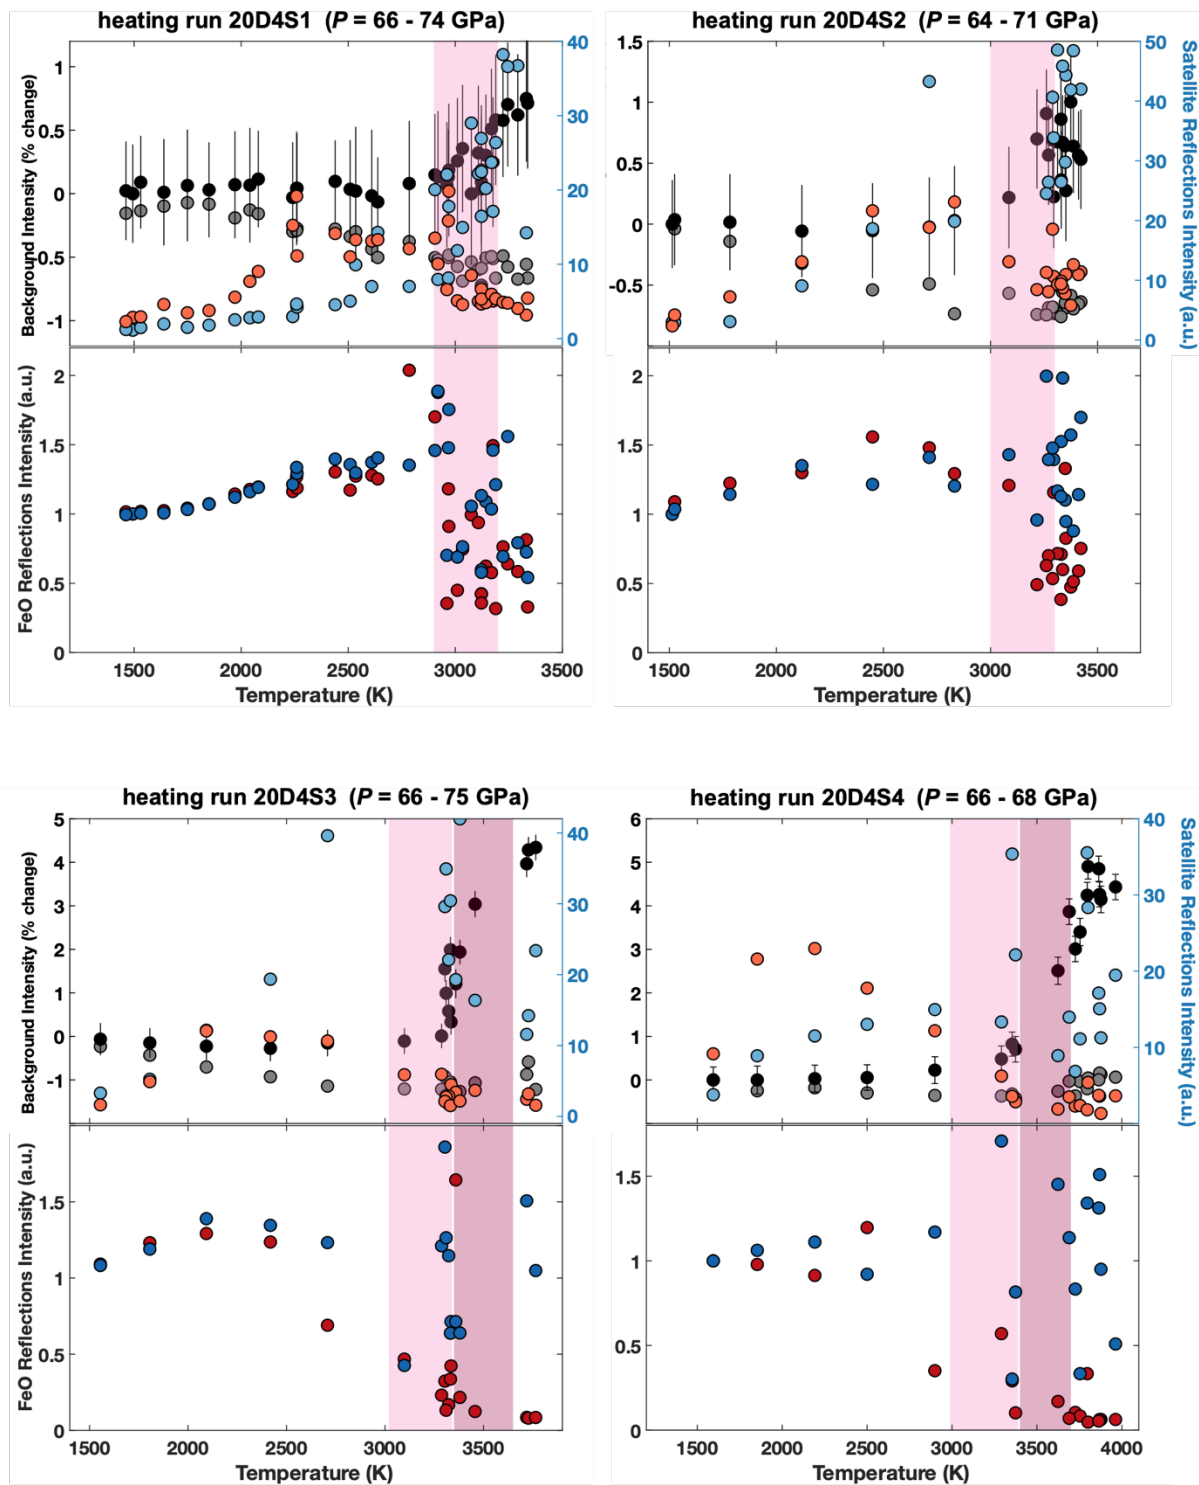

**Fig. S4.**

XRD heating runs 20D4S1, 20D4S2, 20D4S3, and 20D4S4. Format of panels and meaning of colors for data and shaded boxes are identical to Fig. 2.

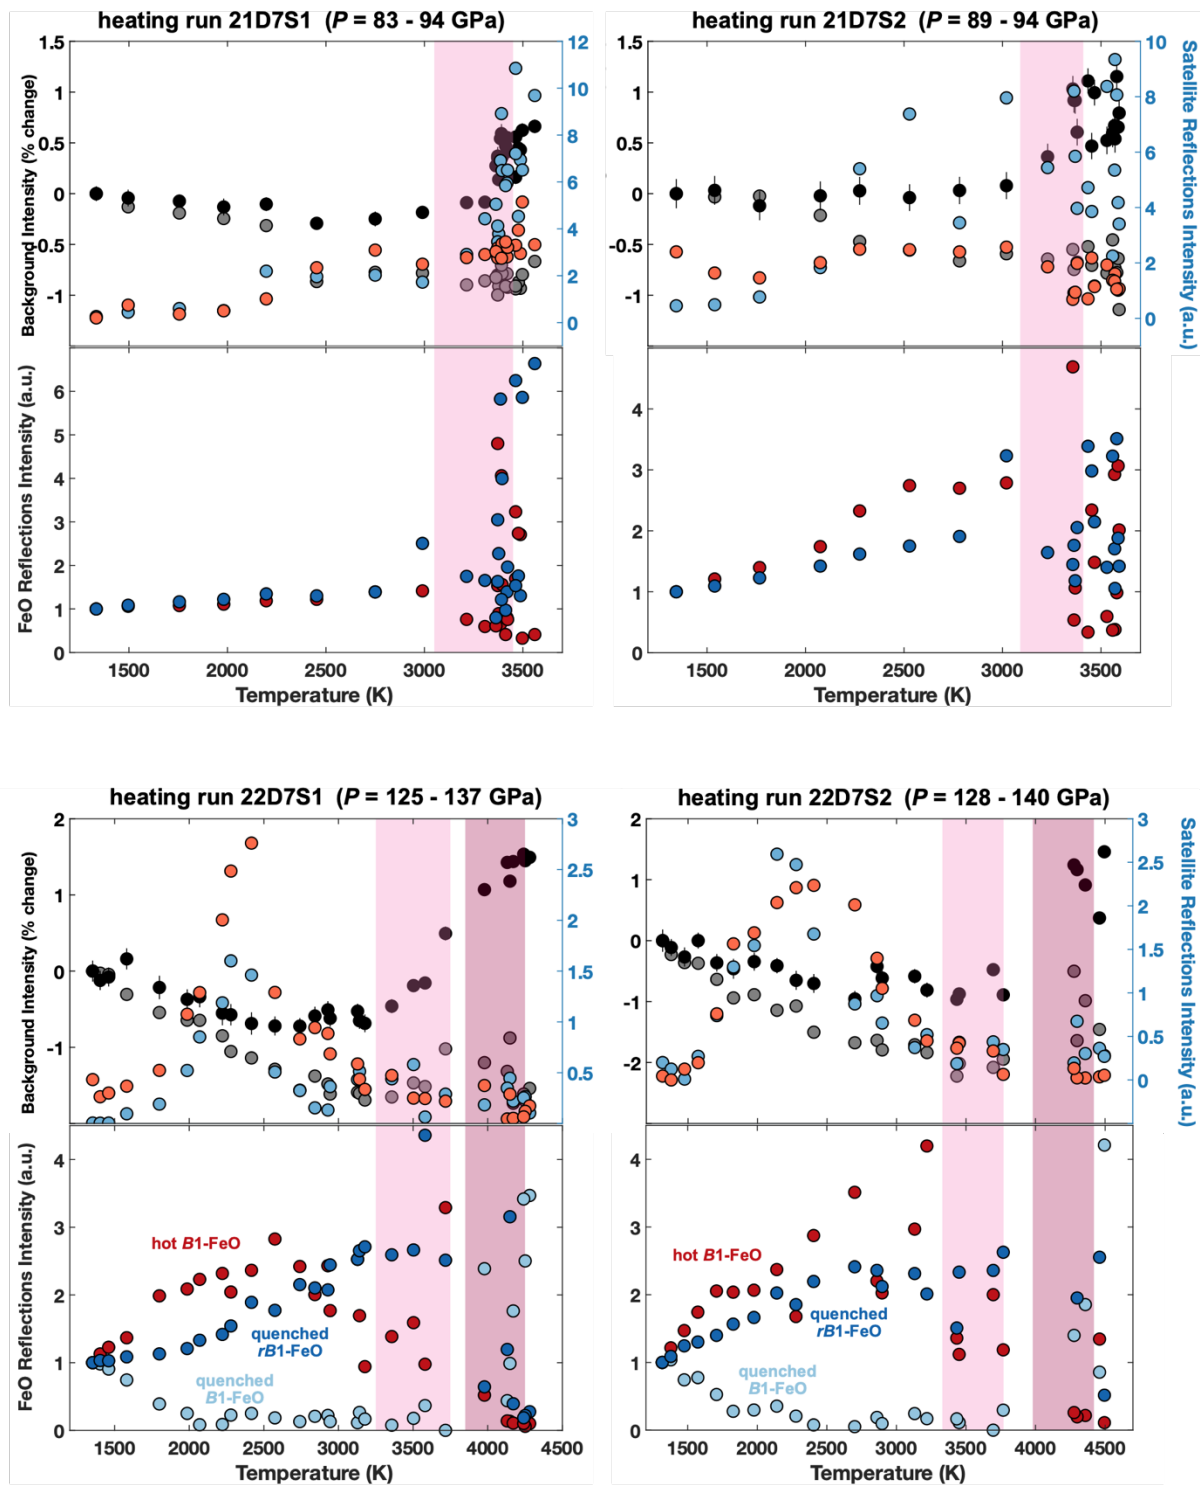

**Fig. S5.**

XRD heating runs 21D7S1, 21D7S2, 22D7S1, and 22D7S2. Format of panels and meaning of colors for data and shaded boxes are identical to Fig. 2.

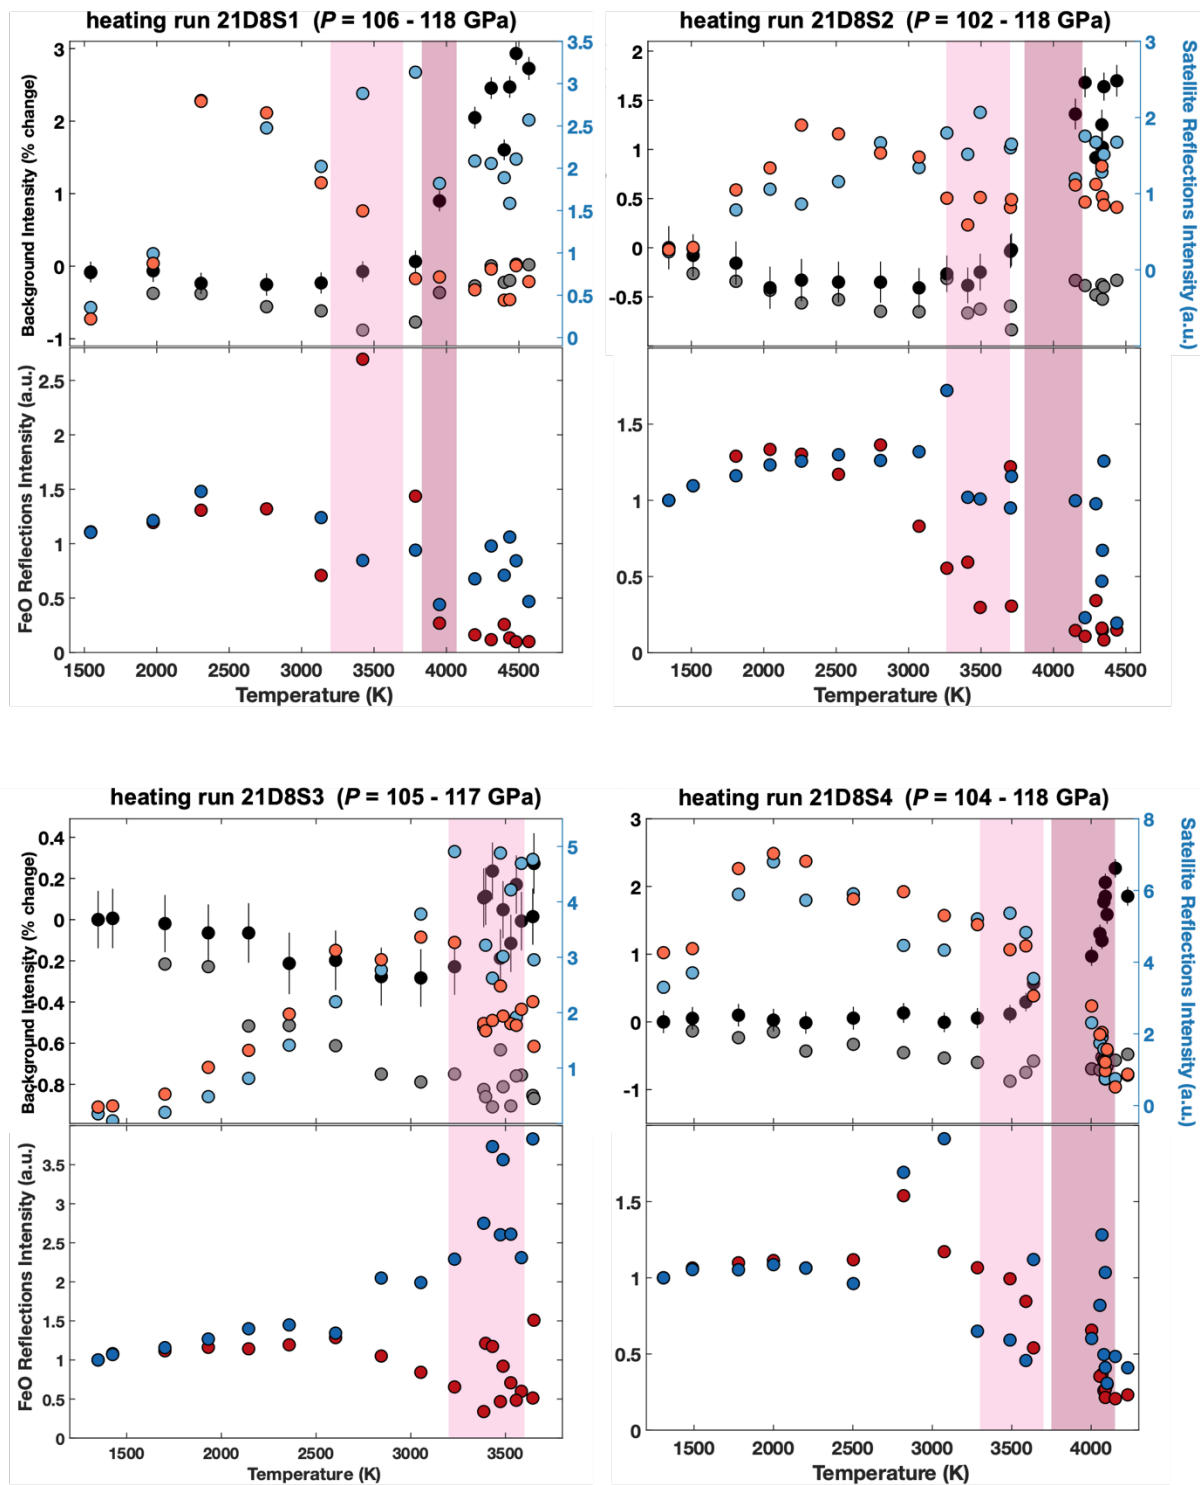

**Fig. S6.**

XRD heating runs 21D8S1, 21D8S2, 21D8S3, and 21D8S4. Format of panels and meaning of colors for data and shaded boxes are identical to Fig. 2.

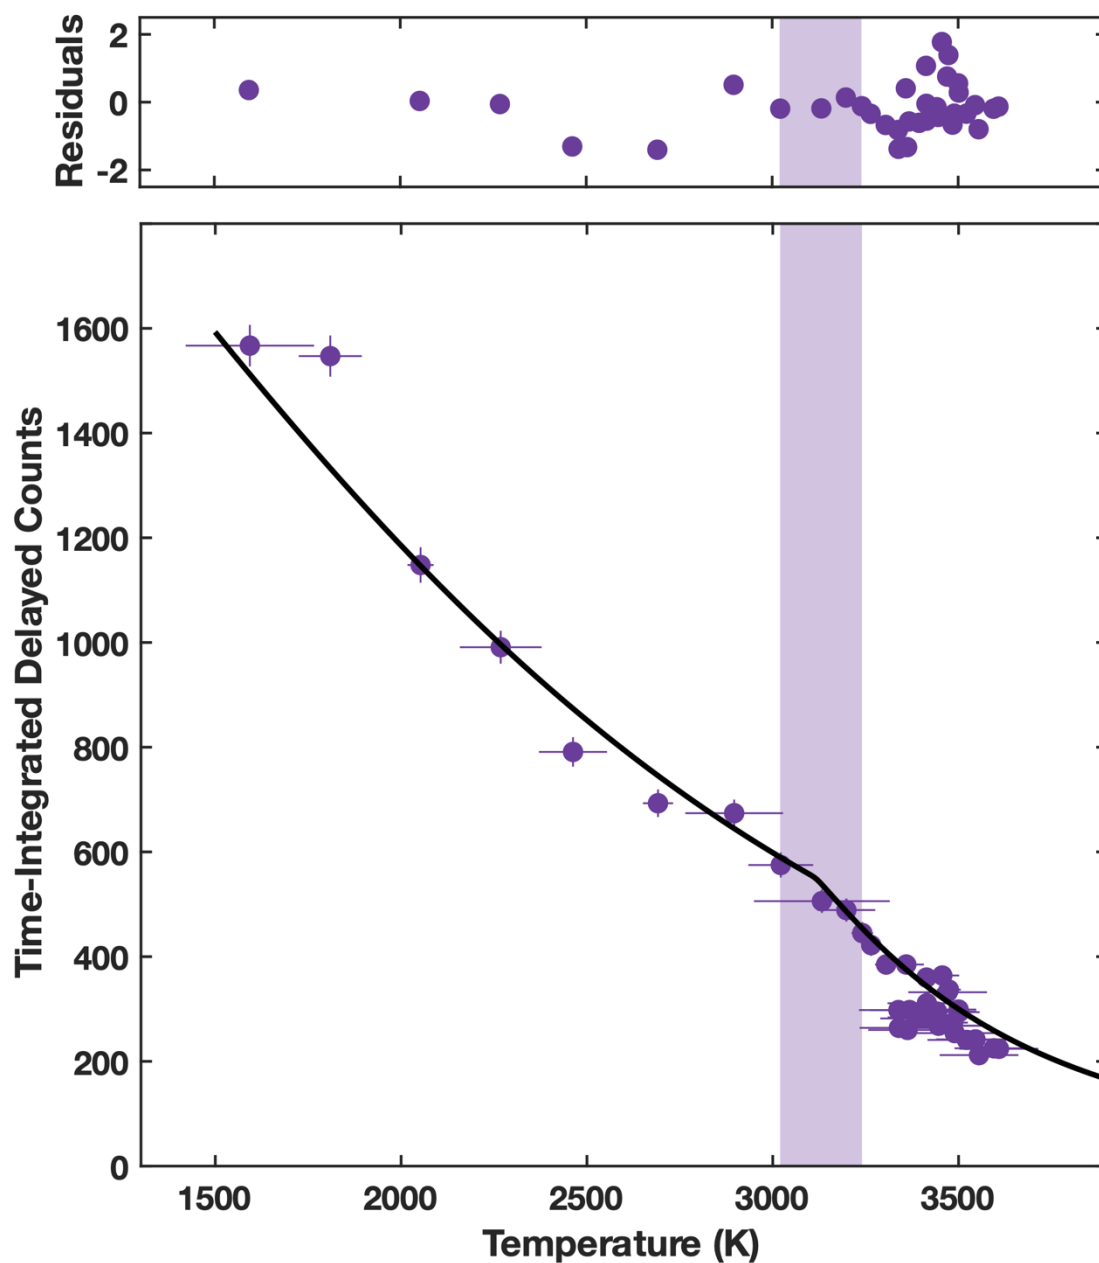

**Fig. S7.**

SMS heating run 18D4P3 ( $P_{\text{melt}} = 48$  GPa). Format of panels and meaning of colors for data, curve, and shaded boxes are identical to Fig. 3.

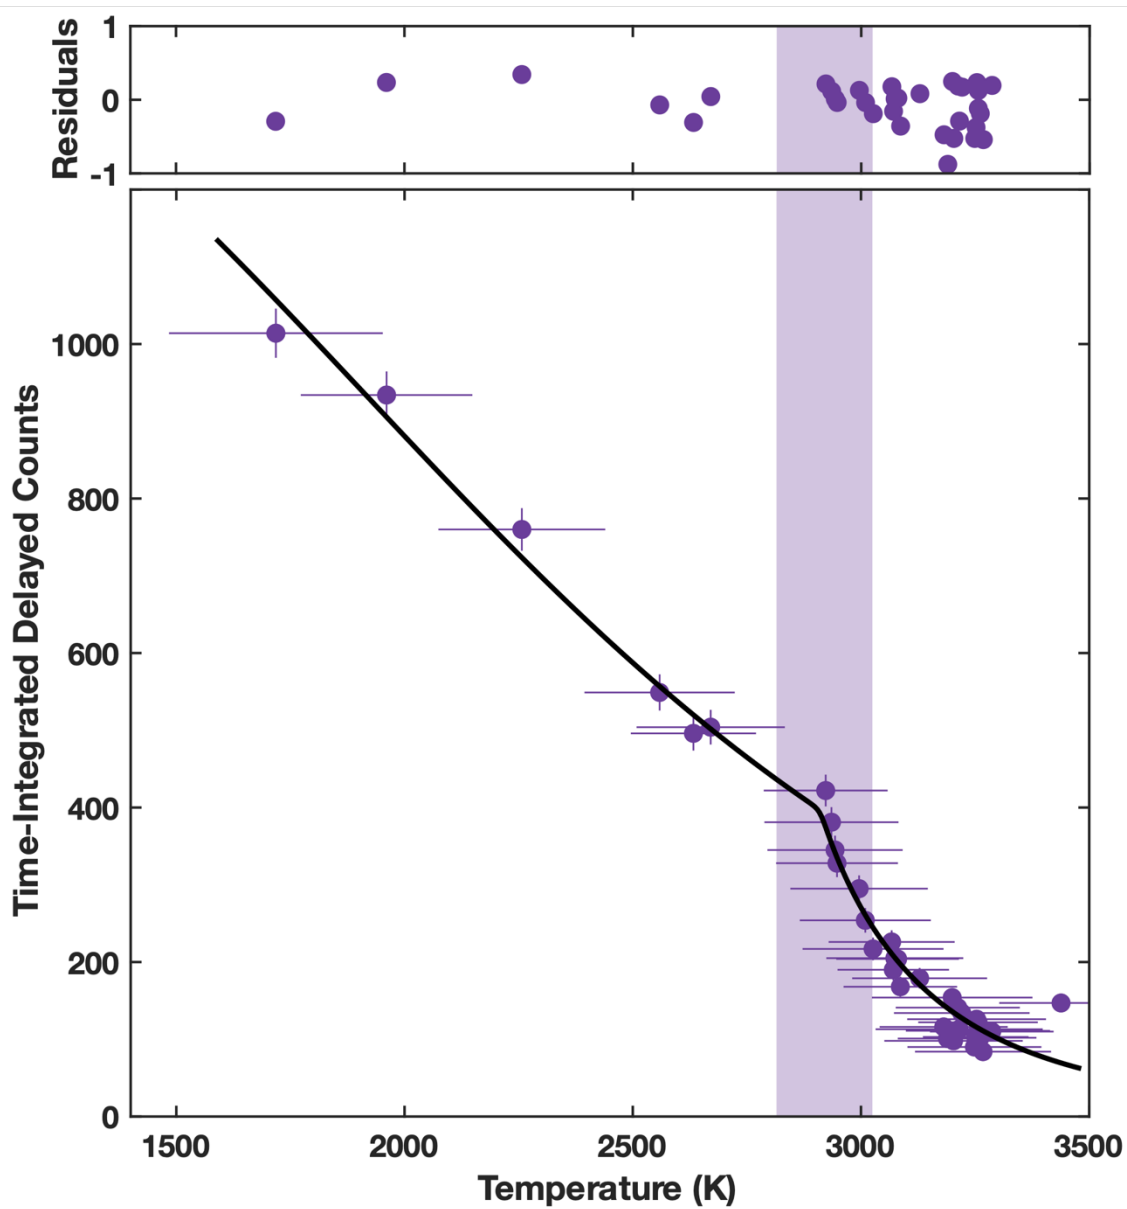

**Fig. S8.**

SMS heating run 18D4P2 ( $P_{\text{melt}} = 37$  GPa). Format of panels and meaning of colors for data, curve, and shaded boxes are identical to Fig. 3.

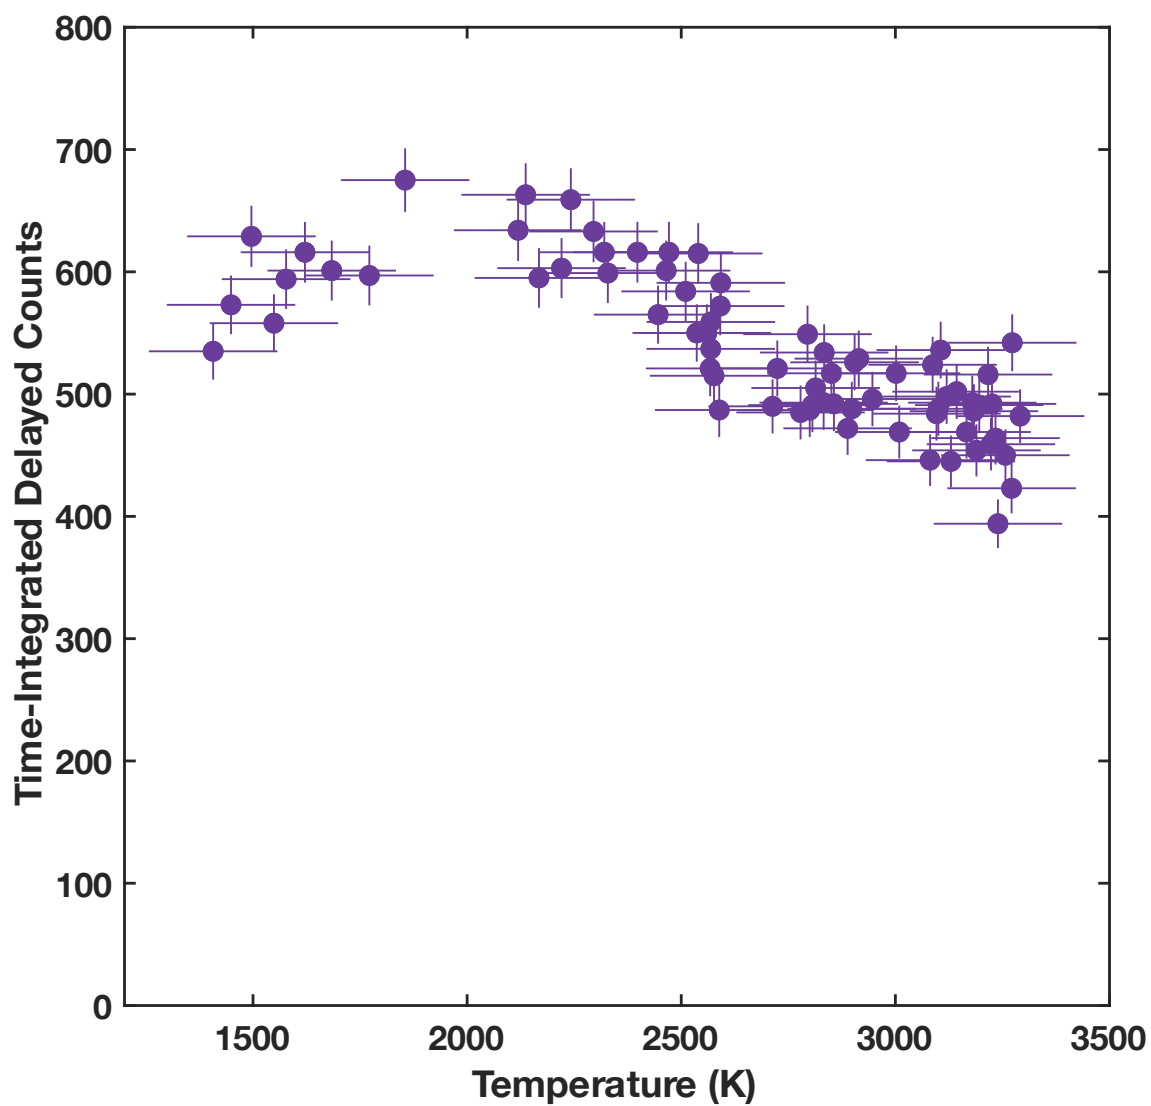

**Fig. S9.**

SMS heating run 19D3p5c ( $P_{\text{max}} = 96$  GPa). Format of panels and meaning of colors for data, curve, and shaded boxes are identical to Fig. 3. In this heating run, no signature of melting (loss of Mössbauer signal intensity) was observed up to the highest temperature.

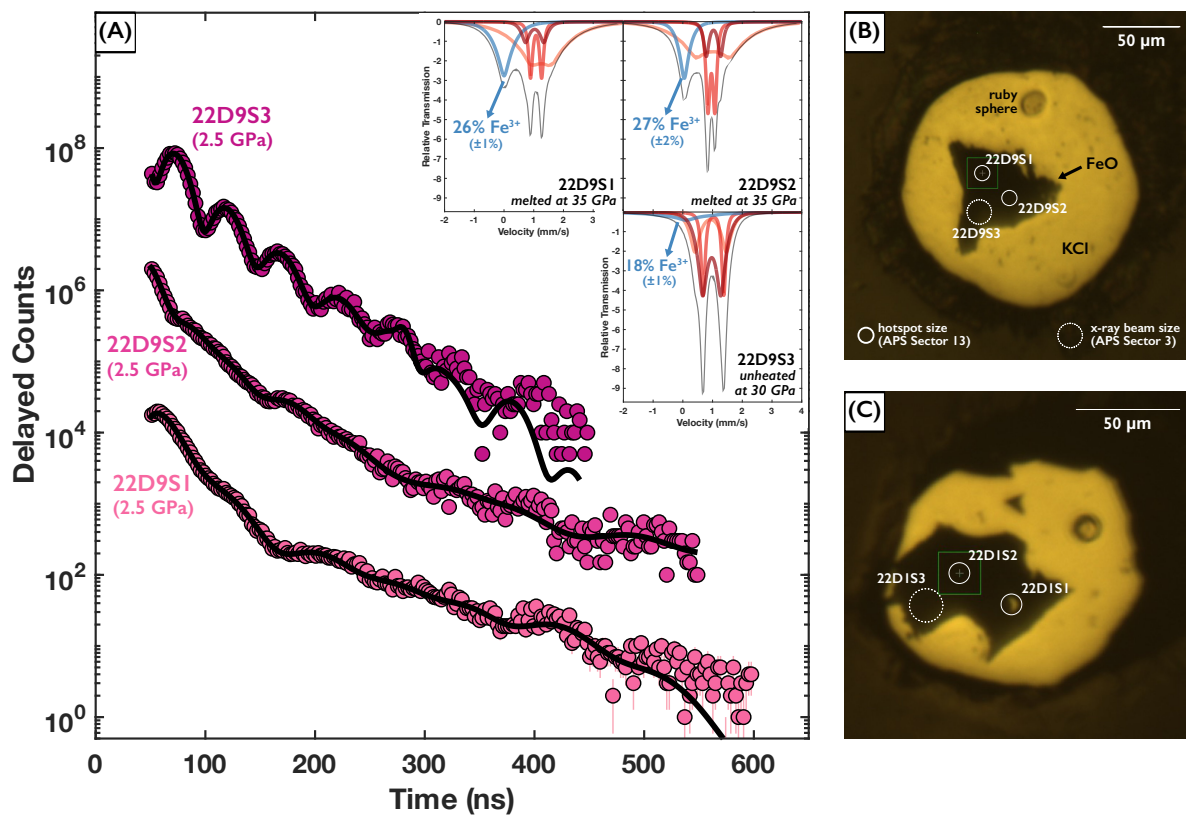

**Fig. S10.**

(A) SMS time spectra 22D9S1, 22D9S2, and 22D9S3 showing data (colored points) and best-fitting models (black lines). Insets show best-fitting models calculated in energy domain, showing the ferric iron lines in light blue. See Tables S8-10 for full details. (B) and (C) show FeO samples heated at Sector 13 (XRD) and decompressed to  $\sim 2.5$  GPa for SMS measurements at Sector 3. Circles show locations of heating spots and SMS measurements, with circle sizes representing sizes of the Sector 3 x-ray beam (dashed) and Sector 13 laser hotspot (solid).

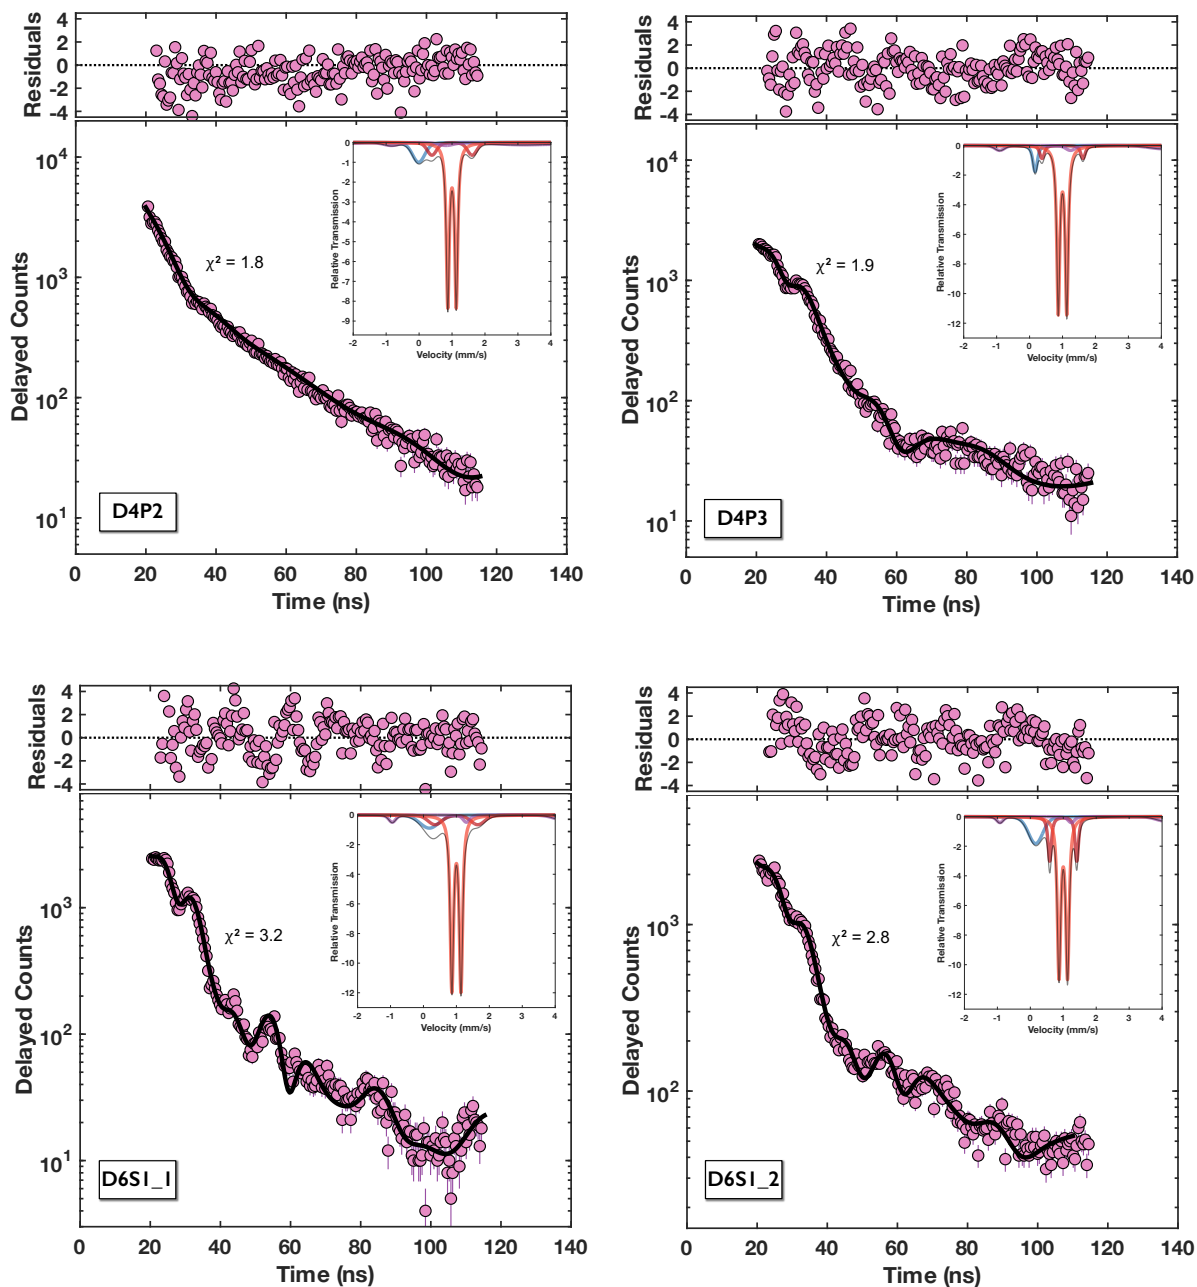

**Fig. S11.**

SMS time spectra (24-bunch top-up mode) D4P2 (top left), D4P3 (top right), D6S1\_1 (bottom left), and D6S1\_2 (bottom right) showing data (colored points) and best-fitting models (black lines). D4P2, D4P3, and D6S1\_1 are collected before the corresponding heating runs at the annealing temperature of  $\sim 1500$  K (Tables S4-6), while D6S1\_2 is collected after heating run 18D6S1 (Table S7). Insets show best-fitting models calculated in energy domain, showing the ferric iron lines in light blue.

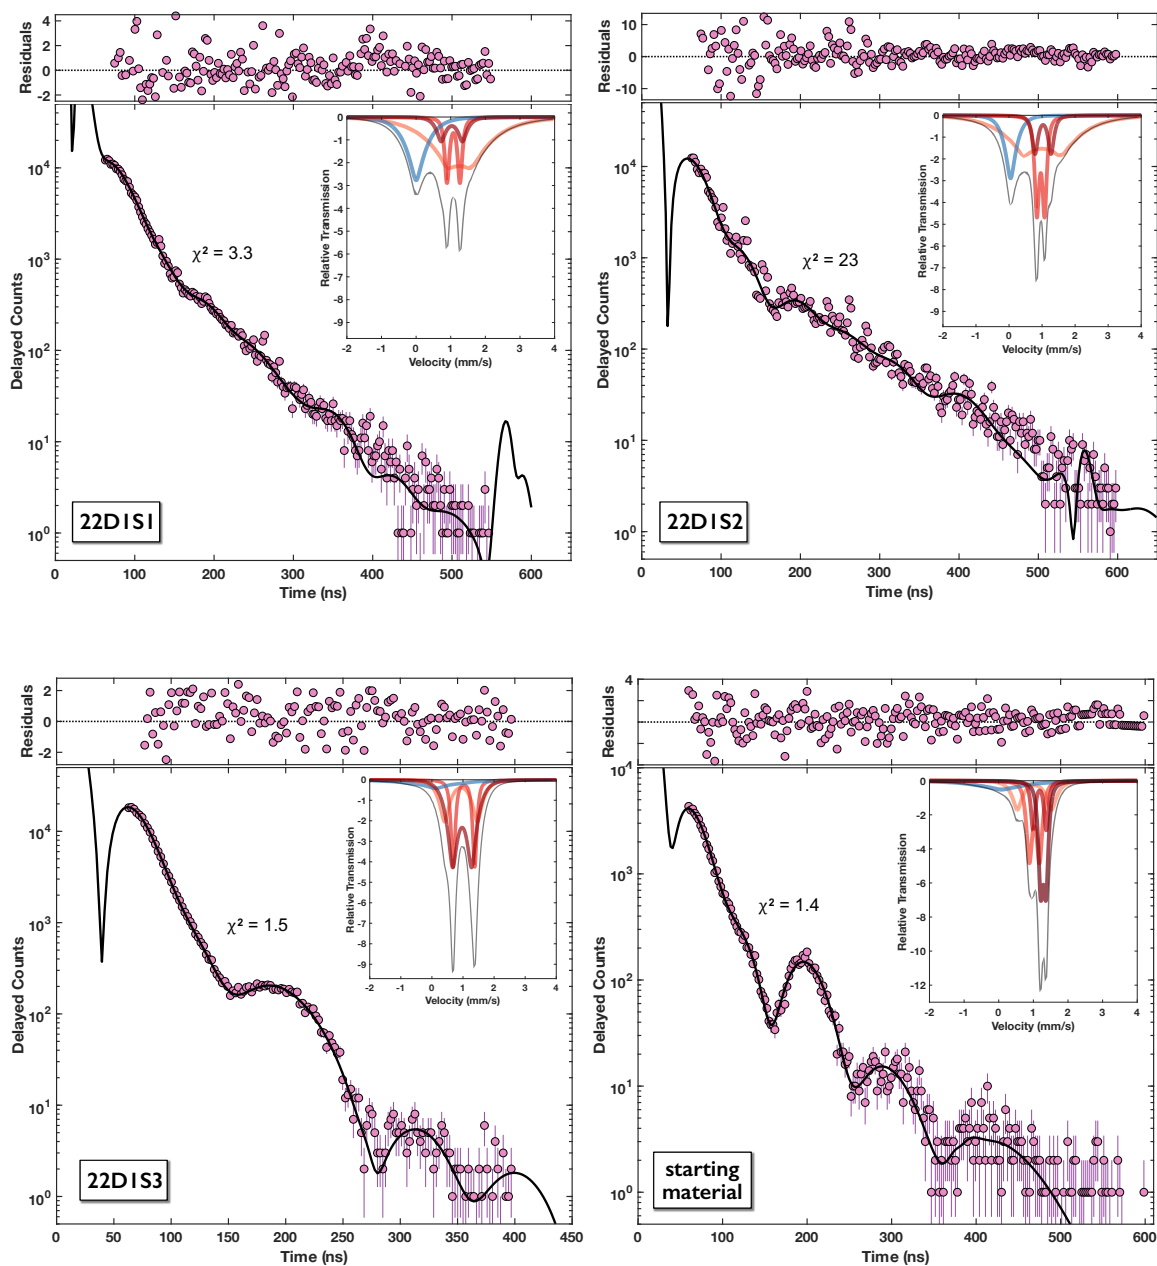

**Fig. S12.**

SMS time spectra (hybrid mode) 22D1S1 (top left), 22D1S2 (top right), 22D1S3 (bottom left), and starting material (bottom right) showing data (colored points) and best-fitting models (black lines). Insets show best-fitting models calculated in energy domain, showing the ferric iron lines in light blue. See Tables S11-14 for full details.

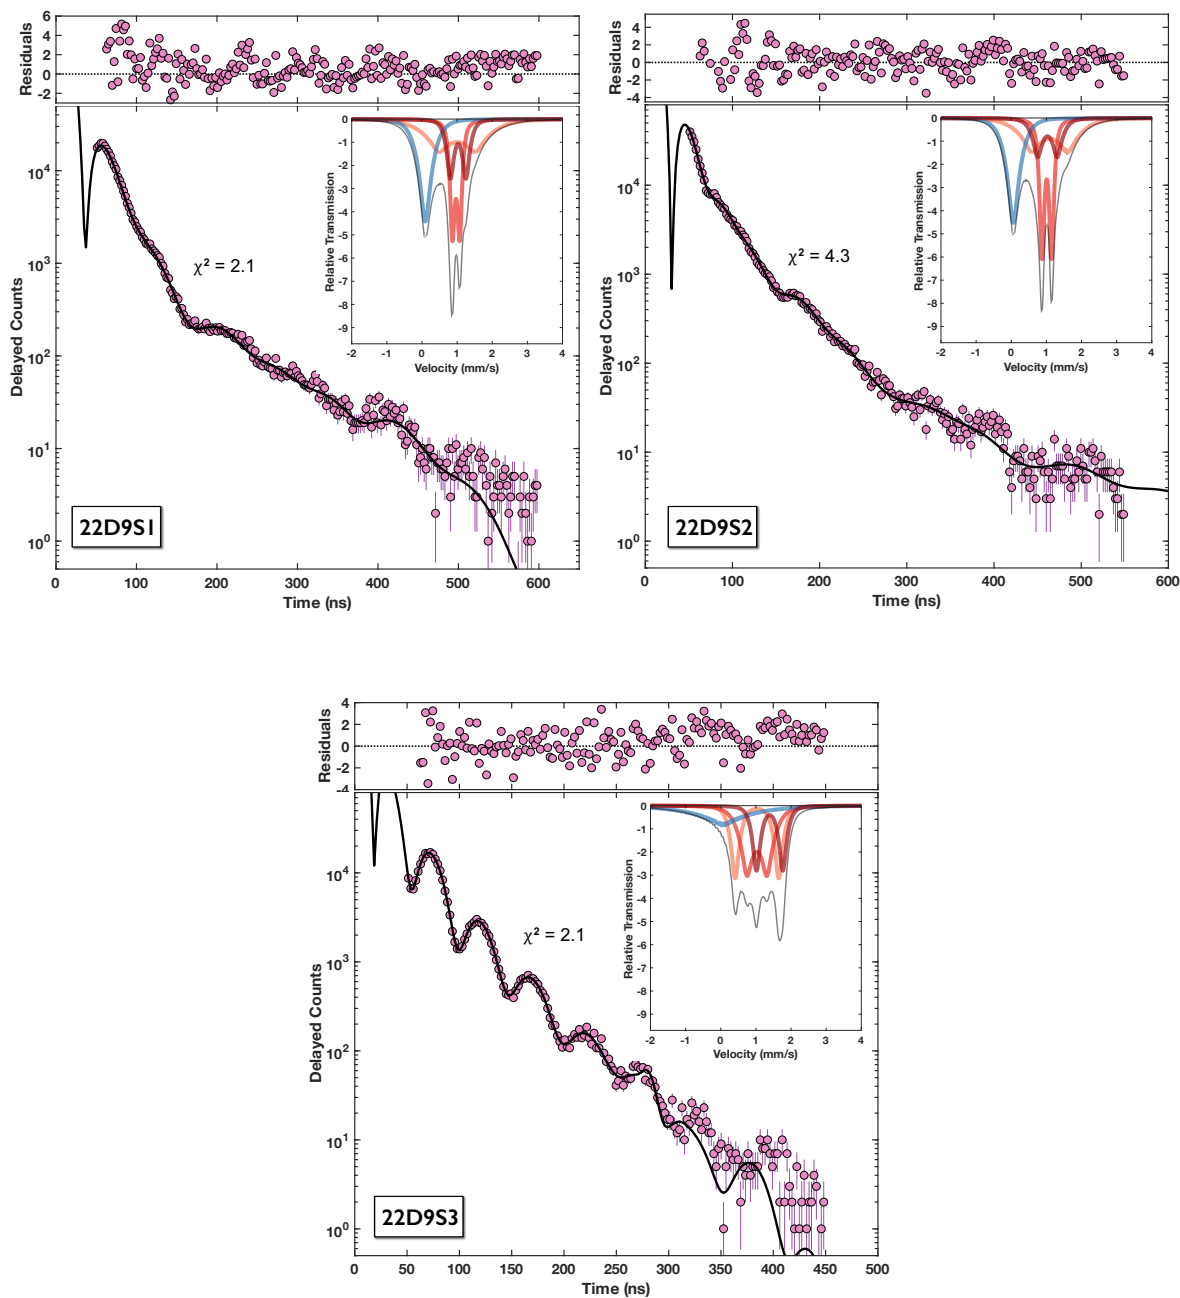

**Fig. S13.**

SMS time spectra (hybrid mode) 22D9S1 (top left), 22D9S2 (top right), and 22D9S3 (bottom), showing data (colored points) and best-fitting models (black lines). Insets show best-fitting models calculated in energy domain, showing the ferric iron lines in light blue. See Tables S8-10 for full details.

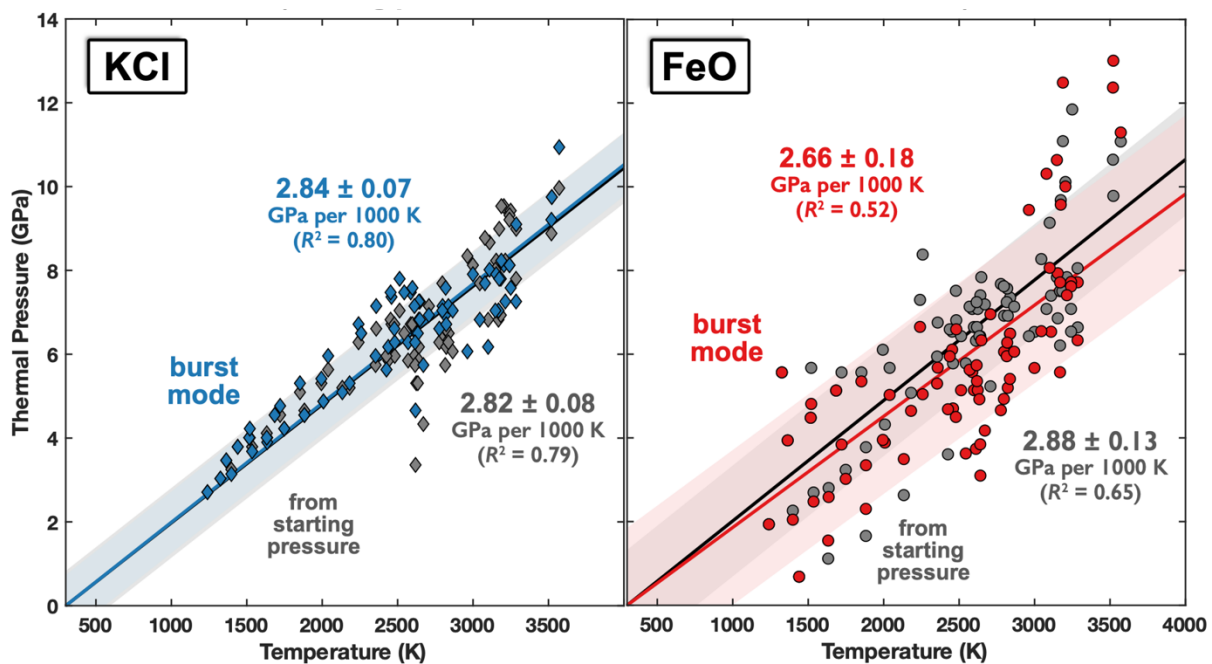

**Fig. S14.**

Thermal pressures from four representative XRD heating runs (starting pressures 32 GPa, 59 GPa, 66 GPa, 86 GPa). See Methods for details.

**Table S1.***P-T* conditions of the defect order-disorder transition in XRD heating runs.

| Heating run | $P_{1, \text{KCl}}$ (GPa) | $P_{1, \text{FeO}}$ (GPa) | $P_1$ (GPa) | $\sigma P_1$ (GPa) | $T_1$ (K) | $\sigma T_1$ (K) |
|-------------|---------------------------|---------------------------|-------------|--------------------|-----------|------------------|
| 22D9S1      | 39.5                      | 38.8                      | 40          | 2                  | 2570      | 130              |
| 22D9S2      | 37.7                      | 37.4                      | 38          | 1                  | 2680      | 80               |
| 21D1S3      | 63.1                      | 63.7                      | 63          | 2                  | 2950      | 250              |
| 21D1S2      | 64.5                      | 65.1                      | 65          | 2                  | 3020      | 120              |
| 21D1S1      | 65.6                      | 66.6                      | 66          | 3                  | 2950      | 150              |
| 22D1S2      | 68.5                      | 68.3                      | 68          | 2                  | 3000      | 160              |
| 22D1S1      | 65.3                      | 68.1                      | 67          | 3                  | 3050      | 150              |
| 20D4S2      | 72.9                      | 69.9                      | 71          | 4                  | 3050      | 150              |
| 20D4S1      | 74.7                      | 73.4                      | 74          | 2                  | 3150      | 150              |
| 20D4S3      | 74.7                      | 74.4                      | 75          | 1                  | 3180      | 160              |
| 20D4S4      | 74.8                      | 74.7                      | 75          | 1                  | 3200      | 200              |
| 21D7S1      | 91.9                      | 95.0                      | 94          | 5                  | 3250      | 200              |
| 21D7S2      | 95.0                      | 92.9                      | 94          | 5                  | 3250      | 160              |
| 21D8S1      | 113.4                     | 113.6                     | 114         | 4                  | 3450      | 250              |
| 21D8S2      | 113.2                     | 116.3                     | 115         | 6                  | 3480      | 220              |
| 21D8S3      | 112.8                     | 120.6                     | 117         | 8                  | 3400      | 200              |
| 21D8S4      | 115.1                     | 117.2                     | 116         | 5                  | 3500      | 200              |
| 22D7S1      | 131.7                     | 134.2                     | 133         | 6                  | 3500      | 250              |
| 22D7S2      | 136.6                     | 136.5                     | 137         | 5                  | 3550      | 220              |

**Table S2.**

*P-T* conditions of the melting transition in XRD heating runs.

| Heating run | $P_{2, \text{KCl}}$ (GPa) | $P_{2, \text{FeO}}$ (GPa) | $P_2$ (GPa) | $\sigma P_2$ (GPa) | $T_2$ (K) | $\sigma T_2$ (K) |
|-------------|---------------------------|---------------------------|-------------|--------------------|-----------|------------------|
| 22D9S1      | 38.3                      | 38.3                      | 38          | 2                  | 2800      | 120              |
| 22D9S2      | 34.0                      | 38.1                      | 36          | 4                  | 2850      | 100              |
| 22D1S1      | 67.1                      | 71.6                      | 69          | 4                  | 3500      | 150              |
| 20D4S3      | 75.8                      | 76.8                      | 76          | 3                  | 3500      | 150              |
| 20D4S4      | 75.6                      | 76.7                      | 76          | 3                  | 3550      | 150              |
| 21D8S1      | 115.7                     | 119.5                     | 118         | 4                  | 3950      | 120              |
| 21D8S2      | 114.9                     | 120.3                     | 118         | 6                  | 4000      | 200              |
| 21D8S4      | 116.1                     | 120.8                     | 118         | 5                  | 3950      | 200              |
| 22D7S1      | 135.2                     | 137.9                     | 137         | 5                  | 4050      | 200              |
| 22D7S2      | 138.8                     | 140.1                     | 140         | 6                  | 4200      | 220              |

**Table S3.**

Best-fit results obtained from the synchrotron Mössbauer spectroscopy heating runs.

| Heating run | Starting $P_{\text{ruby}}$ (GPa) | $P_{\text{melt}}$ (GPa) | $\sigma P_{\text{melt}}$ (GPa) | $T_{\text{melt}}$ (K) | $\sigma T_{\text{melt}}$ (K) | $\chi^2$ |
|-------------|----------------------------------|-------------------------|--------------------------------|-----------------------|------------------------------|----------|
| 18D4P2      | 30                               | 37                      | 3                              | 2920                  | 105                          | 0.37     |
| 18D4P3      | 40                               | 48                      | 3                              | 3130                  | 110                          | 0.76     |
| 18D6S1      | 50                               | 59                      | 3                              | 3400                  | 110                          | 1.64     |

**Table S4.**

Best-fit results for SMS time spectrum D4P2 ( $T = 1700$  K,  $f_{LM} = 0.33$ ) collected before heating run 18D4P2. Pressure is determined from ruby fluorescence measurements before and after heating and the thermal pressure model reported in this study.

| $P = 33 \pm 2$ GPa                    | Site 1<br>(ferrous) | Site 2<br>(ferrous)  | Site 3<br>(ferric)   | Site 4<br>(magnetic) |
|---------------------------------------|---------------------|----------------------|----------------------|----------------------|
| Weight                                | $55 \pm 3\%$        | $11\%^a$             | $11 \pm 4\%$         | $23 \pm 5\%$         |
| Weight<br>(renormalized) <sup>b</sup> | 72%                 | 14%                  | 14%                  | 0%                   |
| Relative Isomer<br>Shift (mm/s)       | 0                   | 0                    | $-0.98 \pm 0.02$     | $-0.98 \pm 0.02^c$   |
| Quadrupole<br>Splitting (mm/s)        | $0.25^a$            | $1.18 \pm 0.04$      | 0                    | 0                    |
| FWHM                                  | $0.03^a$ mm/s       | $0.27 \pm 0.03$ mm/s | $0.38 \pm 0.02$ mm/s | $18 \pm 2$ T         |
| Magnetic Hyperfine<br>Field (T)       | 0                   | 0                    | 0                    | $31.4 \pm 0.5$       |
| Thickness ( $\mu\text{m}$ )           | $7.7 \pm 0.4$       |                      |                      |                      |
| Reduced $\chi^2$                      | $1.8 \pm 0.1$       |                      |                      |                      |

<sup>a</sup>These values were fixed during fitting and optimized by iterative manual variation.

<sup>b</sup>Weights are renormalized to report relative contribution to the summed total of sites 1, 2, and 3.

<sup>c</sup>This value was fit using the same fit parameter as for the isomer shift of site 3.

**Table S5.**

Best-fit results for SMS time spectrum D4P3 ( $T = 1600$  K,  $f_{LM} = 0.40$ ) collected before heating run 18D4P3. Pressure is determined from ruby fluorescence measurements before and after heating and the thermal pressure model reported in this study.

| $P = 43 \pm 2$ GPa                    | Site 1<br>(ferrous) | Site 2<br>(ferrous) | Site 3<br>(ferric) | Site 4<br>(magnetic) |
|---------------------------------------|---------------------|---------------------|--------------------|----------------------|
| Weight                                | $60 \pm 4\%$        | $6.5\%^a$           | $6.5 \pm 3\%$      | $27 \pm 2\%$         |
| Weight<br>(renormalized) <sup>b</sup> | 82%                 | 9%                  | 9%                 | 0%                   |
| Relative Isomer<br>Shift (mm/s)       | 0                   | 0                   | $-0.81 \pm 0.01$   | $-0.81 \pm 0.01^c$   |
| Quadrupole<br>Splitting (mm/s)        | $0.25^a$            | $1.21 \pm 0.05$     | 0                  | 0                    |
| FWHM                                  | $0.03^a$ mm/s       | $0.1^a$ mm/s        | $0.1^a$ mm/s       | $10.8 \pm 0.4$ T     |
| Magnetic Hyperfine<br>Field (T)       | 0                   | 0                   | 0                  | $40.8 \pm 0.2$       |
| Thickness ( $\mu\text{m}$ )           | $5.58 \pm 0.09$     |                     |                    |                      |
| Reduced $\chi^2$                      | $1.9 \pm 0.1$       |                     |                    |                      |

<sup>a</sup>These values were fixed during fitting and optimized by iterative manual variation.

<sup>b</sup>Weights are renormalized to report relative contribution to the summed total of sites 1, 2, and 3.

<sup>c</sup>This value was fit using the same fit parameter as for the isomer shift of site 3.

**Table S6.**

Best-fit results for SMS time spectrum D6S1\_1 ( $T = 1500$  K,  $f_{LM} = 0.47$ ) collected before heating run 18D6S1. Pressure is determined from ruby fluorescence measurements before and after heating and the thermal pressure model reported in this study.

| $P = 53 \pm 2$ GPa                    | Site 1<br>(ferrous) | Site 2<br>(ferrous)  | Site 3<br>(ferric)   | Site 4<br>(magnetic) |
|---------------------------------------|---------------------|----------------------|----------------------|----------------------|
| Weight                                | $57 \pm 6\%$        | $9\%^a$              | $9 \pm 4\%$          | $25 \pm 2\%$         |
| Weight<br>(renormalized) <sup>b</sup> | 76%                 | 12%                  | 12%                  | 0%                   |
| Relative Isomer<br>Shift (mm/s)       | 0                   | 0                    | $-0.80 \pm 0.01$     | $-0.80 \pm 0.01^c$   |
| Quadrupole<br>Splitting (mm/s)        | $0.27 \pm 0.04$     | $1.26 \pm 0.06$      | 0                    | 0                    |
| FWHM                                  | $0.05^a$ mm/s       | $0.61 \pm 0.06$ mm/s | $0.43 \pm 0.05$ mm/s | $7.2 \pm 0.2$ T      |
| Magnetic Hyperfine<br>Field (T)       | 0                   | 0                    | 0                    | $43.2 \pm 0.1$       |
| Thickness ( $\mu\text{m}$ )           | $5.1 \pm 0.3$       |                      |                      |                      |
| Reduced $\chi^2$                      | $3.2 \pm 0.1$       |                      |                      |                      |

<sup>a</sup>These values were fixed during fitting and optimized by iterative manual variation.

<sup>b</sup>Weights are renormalized to report relative contribution to the summed total of sites 1, 2, and 3.

<sup>c</sup>This value was fit using the same fit parameter as for the isomer shift of site 3.

**Table S7.**

Best-fit results for SMS time spectrum D6S1\_2 ( $T = 1500$  K,  $f_{LM} = 0.47$ ) collected after heating run 18D6S1. Pressure is determined from ruby fluorescence measurements before and after heating and the thermal pressure model reported in this study.

| $P = 53 \pm 2$ GPa                    | Site 1<br>(ferrous) | Site 2<br>(ferrous) | Site 3<br>(ferric)   | Site 4<br>(magnetic) |
|---------------------------------------|---------------------|---------------------|----------------------|----------------------|
| Weight                                | $50 \pm 6\%$        | $15\%^a$            | $15 \pm 4\%$         | $20 \pm 2\%$         |
| Weight<br>(renormalized) <sup>b</sup> | 62%                 | 19%                 | 19%                  | 0%                   |
| Relative Isomer<br>Shift (mm/s)       | 0                   | 0                   | $-0.81 \pm 0.01$     | $-0.81 \pm 0.01^c$   |
| Quadrupole<br>Splitting (mm/s)        | $0.25^a$            | $0.78 \pm 0.01$     | 0                    | 0                    |
| FWHM                                  | $0.05^a$ mm/s       | $0.05^a$ mm/s       | $0.45 \pm 0.03$ mm/s | $6.6 \pm 0.3$ T      |
| Magnetic Hyperfine<br>Field (T)       | 0                   | 0                   | 0                    | $41.1 \pm 0.1$       |
| Thickness ( $\mu\text{m}$ )           | $3.3 \pm 0.2$       |                     |                      |                      |
| Reduced $\chi^2$                      | $2.8 \pm 0.1$       |                     |                      |                      |

<sup>a</sup>These values were fixed during fitting and optimized by iterative manual variation.

<sup>b</sup>Weights are renormalized to report relative contribution to the summed total of sites 1, 2, and 3.

<sup>c</sup>This value was fit using the same fit parameter as for the isomer shift of site 3.

**Table S8.**

Best-fit results for SMS time spectrum 22D9S1 ( $P = 2.5$ ,  $T = 300$  K,  $f_{LM} = 0.70$ , melted at 35 GPa). Pressure is determined from ruby fluorescence measurements.

|                              | Site 1<br>(ferrous) | Site 2<br>(ferrous) | Site 3<br>(ferric) | Site 4<br>(ferrous) |
|------------------------------|---------------------|---------------------|--------------------|---------------------|
| Weight (%)                   | $31 \pm 4$          | 24                  | $26 \pm 1$         | $19 \pm 1$          |
| Relative Isomer Shift (mm/s) | $0.97 \pm 0.01$     | $0.94 \pm 0.01$     | $0.09 \pm 0.01$    | 1 <sup>a</sup>      |
| Quadrupole Splitting (mm/s)  | $1.00 \pm 0.02$     | $0.20 \pm 0.01$     | 0 <sup>a</sup>     | $0.43 \pm 0.01$     |
| FWHM (mm/s)                  | $0.58 \pm 0.04$     | 0.05 <sup>a</sup>   | $0.24 \pm 0.01$    | $0.11 \pm 0.01$     |
| Thickness ( $\mu\text{m}$ )  | $3.82 \pm 0.09$     |                     |                    |                     |
| Reduced $\chi^2$             | $2.1 \pm 0.1$       |                     |                    |                     |

<sup>a</sup>These values were fixed during fitting.

**Table S9.**

Best-fit results for SMS time spectrum 22D9S2 ( $P = 2.5$ ,  $T = 300$  K,  $f_{LM} = 0.70$ , melted at 35 GPa). Pressure is determined from ruby fluorescence measurements.

|                              | Site 1<br>(ferrous) | Site 2<br>(ferrous) | Site 3<br>(ferric) | Site 4<br>(ferrous) |
|------------------------------|---------------------|---------------------|--------------------|---------------------|
| Weight (%)                   | $28 \pm 3$          | 29                  | $27 \pm 2$         | $16 \pm 2$          |
| Relative Isomer Shift (mm/s) | $1.06 \pm 0.01$     | $0.98 \pm 0.01$     | $0.06 \pm 0.01$    | 1 <sup>a</sup>      |
| Quadrupole Splitting (mm/s)  | $0.99 \pm 0.02$     | $0.267 \pm 0.003$   | 0 <sup>a</sup>     | $0.18 \pm 0.02$     |
| FWHM (mm/s)                  | $0.48 \pm 0.03$     | 0.05 <sup>a</sup>   | $0.24 \pm 0.01$    | $0.18 \pm 0.02$     |
| Thickness ( $\mu\text{m}$ )  | $5.17 \pm 0.09$     |                     |                    |                     |
| Reduced $\chi^2$             | $4.3 \pm 0.2$       |                     |                    |                     |

<sup>a</sup>These values were fixed during fitting.

**Table S10.**

Best-fit results for SMS time spectrum 22D9S3 ( $P = 2.5$ ,  $T = 300$  K,  $f_{LM} = 0.70$ , unheated at 30 GPa). Pressure is determined from ruby fluorescence measurements.

|                              | Site 1<br>(ferrous) | Site 2<br>(ferrous) | Site 3<br>(ferric) | Site 4<br>(ferrous) |
|------------------------------|---------------------|---------------------|--------------------|---------------------|
| Weight (%)                   | $26 \pm 2$          | 35                  | $18 \pm 1$         | $21 \pm 2$          |
| Relative Isomer Shift (mm/s) | 1 <sup>a</sup>      | 1 <sup>a</sup>      | $0.07 \pm 0.03$    | $1.35 \pm 0.01$     |
| Quadrupole Splitting (mm/s)  | $1.2 \pm 0.02$      | $0.55 \pm 0.01$     | 0 <sup>a</sup>     | $0.73 \pm 0.02$     |
| FWHM (mm/s)                  | $0.14 \pm 0.01$     | $0.26 \pm 0.01$     | $1.16 \pm 0.01$    | $0.12 \pm 0.01$     |
| Thickness ( $\mu\text{m}$ )  | $11.6 \pm 0.07$     |                     |                    |                     |
| Reduced $\chi^2$             | $2.13 \pm 0.1$      |                     |                    |                     |

<sup>a</sup>These values were fixed during fitting.

**Table S11.**

Best-fit results for SMS time spectrum 22D1S1 ( $P = 2.8$ ,  $T = 300$  K,  $f_{LM} = 0.70$ , melted at 68 GPa). Pressure is determined from ruby fluorescence measurements.

|                              | Site 1<br>(ferrous) | Site 2<br>(ferrous) | Site 3<br>(ferric) | Site 4<br>(ferrous) |
|------------------------------|---------------------|---------------------|--------------------|---------------------|
| Weight (%)                   | $53 \pm 3$          | 14                  | $24 \pm 1$         | $9 \pm 1$           |
| Relative Isomer Shift (mm/s) | $1.22 \pm 0.01$     | $1.05 \pm 0.01$     | $0.00 \pm 0.01$    | 1 <sup>a</sup>      |
| Quadrupole Splitting (mm/s)  | $0.67 \pm 0.01$     | $0.36 \pm 0.01$     | 0 <sup>a</sup>     | $0.60 \pm 0.01$     |
| FWHM (mm/s)                  | $0.91 \pm 0.01$     | 0.05 <sup>a</sup>   | $0.40 \pm 0.01$    | $0.17 \pm 0.01$     |
| Thickness ( $\mu\text{m}$ )  | $7.9 \pm 0.2$       |                     |                    |                     |
| Reduced $\chi^2$             | $3.3 \pm 0.1$       |                     |                    |                     |

<sup>a</sup>These values were fixed during fitting.

**Table S12.**

Best-fit results for SMS time spectrum 22D1S2 ( $P = 2.8$ ,  $T = 300$  K,  $f_{LM} = 0.70$ , heated at 68 GPa to XRD  $T_1$  (subsolidus defect order-disorder transition)). Pressure is determined from ruby fluorescence measurements.

|                              | Site 1<br>(ferrous) | Site 2<br>(ferrous) | Site 3<br>(ferric) | Site 4<br>(ferrous) |
|------------------------------|---------------------|---------------------|--------------------|---------------------|
| Weight (%)                   | $52 \pm 10$         | 21                  | $16 \pm 3$         | $11 \pm 2$          |
| Relative Isomer Shift (mm/s) | $0.98 \pm 0.03$     | $0.93 \pm 0.01$     | $0.05 \pm 0.01$    | 1 <sup>a</sup>      |
| Quadrupole Splitting (mm/s)  | $1.11 \pm 0.01$     | $0.23 \pm 0.02$     | 0 <sup>a</sup>     | $0.47 \pm 0.02$     |
| FWHM (mm/s)                  | $0.92 \pm 0.01$     | 0.05 <sup>a</sup>   | $0.22 \pm 0.02$    | $0.09 \pm 0.02$     |
| Thickness ( $\mu\text{m}$ )  | $4.7 \pm 0.4$       |                     |                    |                     |
| Reduced $\chi^2$             | $22.7 \pm 0.3$      |                     |                    |                     |

<sup>a</sup>These values were fixed during fitting.

**Table S13.**

Best-fit results for SMS time spectrum 22D1S3 ( $P = 2.8$ ,  $T = 300$  K,  $f_{LM} = 0.70$ , unheated at 60 GPa). Pressure is determined from ruby fluorescence measurements.

|                              | Site 1<br>(ferrous) | Site 2<br>(ferrous) | Site 3<br>(ferric) | Site 4<br>(ferrous) |
|------------------------------|---------------------|---------------------|--------------------|---------------------|
| Weight (%)                   | $23 \pm 6$          | 21                  | $9 \pm 7$          | $47 \pm 20$         |
| Relative Isomer Shift (mm/s) | $0.91 \pm 0.01$     | 1 <sup>a</sup>      | $0.11 \pm 0.07$    | $0.94 \pm 0.01$     |
| Quadrupole Splitting (mm/s)  | $1.02 \pm 0.04$     | $0.67 \pm 0.05$     | 0 <sup>a</sup>     | $0.59 \pm 0.03$     |
| FWHM (mm/s)                  | $0.23 \pm 0.01$     | 0.005 <sup>a</sup>  | $1.14 \pm 0.02$    | $0.23 \pm 0.03$     |
| Thickness ( $\mu\text{m}$ )  | $4.0 \pm 0.3$       |                     |                    |                     |
| Reduced $\chi^2$             | $1.5 \pm 0.1$       |                     |                    |                     |

<sup>a</sup>These values were fixed during fitting.

**Table S14.**

Best-fit results for the starting sample material ( $P = 1$  bar,  $T = 300$  K,  $f_{LM} = 0.70$ ). Pressure is determined from ruby fluorescence measurements.

|                                 | Site 1<br>(ferrous) | Site 2<br>(ferrous) | Site 3<br>(ferric) | Site 4<br>(ferrous) | Site 5<br>(ferrous) |
|---------------------------------|---------------------|---------------------|--------------------|---------------------|---------------------|
| Weight (%)                      | $18 \pm 1$          | 28                  | $11.2 \pm 0.4$     | $13 \pm 1$          | $30 \pm 3$          |
| Relative Isomer<br>Shift (mm/s) | 1 <sup>a</sup>      | 1 <sup>a</sup>      | $0.07 \pm 0.02$    | $1.15 \pm 0.01$     | $1.25 \pm 0.01$     |
| Quadrupole<br>Splitting (mm/s)  | $0.96 \pm 0.01$     | $0.29 \pm 0.01$     | 0 <sup>a</sup>     | $0.37 \pm 0.02$     | 0.15 <sup>a</sup>   |
| FWHM (mm/s)                     | $0.19 \pm 0.01$     | $0.078 \pm 0.004$   | $1.05 \pm 0.01$    | $0.04 \pm 0.01$     | 0.05 <sup>a</sup>   |
| Thickness ( $\mu\text{m}$ )     | $5.95 \pm 0.03$     |                     |                    |                     |                     |
| Reduced $\chi^2$                | $1.38 \pm 0.08$     |                     |                    |                     |                     |

<sup>a</sup>These values were fixed during fitting.
