# Supplementary material for: Melting and defect transitions in FeO up to pressures of Earth’s core-mantle boundary
Source: Nat Commun. 2023 Nov 13;14:7336. doi: 10.1038/s41467-023-43154-w (PMC10643405; doi:10.1038/s41467-023-43154-w)
Supplement: Supplementary file 3 — Source Data [file 41467_2023_43154_MOESM3_ESM.xlsx]

## Sheet: Sheet1
Heating run	P1, KCl (GPa)	P1, FeO (GPa)	P1 (GPa)	sP1 (GPa)	T1 (K)	sT1 (K)
22D9S1	39.5	38.8	40	2	2570	130
22D9S2	37.7	37.4	38	1	2680	80
21D1S3	63.1	63.7	63	2	2950	250
21D1S2	64.5	65.1	65	2	3020	120
21D1S1	65.6	66.6	66	3	2950	150
22D1S2	68.5	68.3	68	2	3000	160
22D1S1	65.3	68.1	67	3	3050	150
20D4S2	72.9	69.9	71	4	3050	150
20D4S1	74.7	73.4	74	2	3150	150
20D4S3	74.7	74.4	75	1	3180	160
20D4S4	74.8	74.7	75	1	3200	200
21D7S1	91.9	95	94	5	3250	200
21D7S2	95	92.9	94	5	3250	160
21D8S1	113.4	113.6	114	4	3450	250
21D8S2	113.2	116.3	115	6	3480	220
21D8S3	112.8	120.6	117	8	3400	200
21D8S4	115.1	117.2	116	5	3500	200
22D7S1	131.7	134.2	133	6	3500	250
22D7S2	136.6	136.5	137	5	3550	220
Table S1.
P-T conditions of the defect order-disorder transition in XRD heating runs.
Heating run	P2, KCl (GPa)	P2, FeO (GPa)	P2 (GPa)	sP2 (GPa)	T2 (K)	sT2 (K)
22D9S1	38.3	38.3	38	2	2800	120
22D9S2	34	38.1	36	4	2850	100
22D1S1	67.1	71.6	69	4	3500	150
20D4S3	75.8	76.8	76	3	3500	150
20D4S4	75.6	76.7	76	3	3550	150
21D8S1	115.7	119.5	118	4	3950	120
21D8S2	114.9	120.3	118	6	4000	200
21D8S4	116.1	120.8	118	5	3950	200
22D7S1	135.2	137.9	137	5	4050	200
22D7S2	138.8	140.1	140	6	4200	220
Table S2.
P-T conditions of the melting transition in XRD heating runs.
Heating run	Starting Pruby (GPa)	Pmelt (GPa)	sPmelt (GPa)	Tmelt (K)	sTmelt (K)	c2
18D4P2	30	37	3	2920	105	0.37
18D4P3	40	48	3	3130	110	0.76
18D6S1	50	59	3	3400	110	1.64
Table S3.
Best-fit results obtained from the synchrotron Mössbauer spectroscopy heating runs.
